# Supplementary material for: From motivation to meaning in medical humanities: a mixed-methods study of Chinese medical students’ value internalization
Source: Research Square preprint supplement (doi:10.21203/rs.3.rs-7488873/v1), 2025-12-03
Supplement: Supplementary file 1 [file c81b063c3d2a7f55c362395d.docx]

# Supplementary File2.

# Semi-Structured Interview Guide (English Version)

**Purpose:** To explore how medical students’ motivation, emotions, and experiences influence the internalization of humanistic values through medical humanities learning.

**Opening**

Thank you for participating. This interview is about your experiences in the [Tourism Culture/medical humanities] course and how it has affected your views and professional development.

Your answers will be kept confidential. You may skip any question or stop at any time.

**Section A. Motivation for Participation**

1. What motivated you to take this course? (Interest, requirement, curiosity, or something else?)

2. Did your expectations about the course change after you started it? If yes, how?

**Section B. Learning and Emotional Engagement**

3. Can you describe a learning activity or moment in the course that impressed you most? Why?

4. Did you experience any strong emotions (positive or negative) during the course? How did those emotions affect your learning or reflection?

**Section C. Connection to Professional Development**

5. How do you think this course is related to your future role as a doctor/nurse/public health professional?

6. Have you applied or reflected on the values learned in this course during your clinical training or daily life? Can you give an example?

**Section D. Reflection and Suggestions**

7. What did you gain most from this course, in terms of knowledge, values, or attitudes?

8. What challenges or difficulties did you face while taking this course?

9. What suggestions do you have for improving the teaching of humanities in medical education?

**Closing**

Is there anything else you would like to share about your experience in this course?

Thank you for your time and valuable insights.
