# Supplementary material for: From motivation to meaning in medical humanities: a mixed-methods study of Chinese medical students’ value internalization
Source: Research Square preprint supplement (doi:10.21203/rs.3.rs-7488873/v1), 2025-12-03
Supplement: Supplementary file 2 [file d9d7845ae098923404559b8f.docx]

# Supplementary File 1.

# Survey Instrument

**Purpose:** To measure medical students’ motivation, satisfaction, and professional identity outcomes in the context of medical humanities education.

**Part A. Demographic Information**

Gender: ☐ Male ☐ Female

Program: ☐ Clinical Medicine ☐ Nursing ☐ Public Health

Year of Study: ☐ Junior (1–2) ☐ Senior (3–5)

**Part B. Motivation** (5-point Likert scale: 1 = Strongly Disagree, 5 = Strongly Agree)

Developmental Motivation (autonomous, growth-oriented):

1. I take this course because I want to broaden my cultural and professional horizons.

2. I believe the course will help me become a more competent and caring medical professional.

3. I am interested in understanding humanistic values beyond clinical knowledge.

Avoidant Motivation (controlled, compliance-driven):

4. I take this course mainly because it is a requirement for credits.

5. I participate only to avoid negative consequences (e.g., low grades, failing the course).

6. I would not take this course if it were optional.

**Part C. Course Satisfaction** (5-point Likert scale)

7. I am satisfied with the content and design of this course.

8. The teaching activities (e.g., discussions, case studies, role-play) were engaging.

9. Overall, this course met or exceeded my expectations.

**Part D. Professional Identity Indicators** (5-point Likert scale)

10. This course enhanced my sense of empathy toward patients.

11. I feel more responsible for patients’ well-being after this course.

12. The course encouraged me to reflect on the values of respect, compassion, and responsibility.

13. I can connect the course content with my future clinical practice.

**Part E. Open-Ended Questions**

14. What did you learn from this course that was most meaningful to you?

15. How do you think this course could be improved to better support your professional development?
